# Supplementary material for: Carbonaceous submicron sized islands: a surface patterning route to hierarchical macro/mesoporous thin films
Source: Royal Society of Chemistry journal article supplement (doi:10.1039/b902378j), 2009-01-01

**Electronic Supplementary Information for:**

**Carbonaceous submicron sized islands: a surface patterning route to hierarchical macro-mesoporous thin films**

Andrés Zelcer, Alejandro Wolosiuk and Galo J. A. A. Soler-Illia

Infrared spectra of : a) Hierarchically textured mesoporous SiO<sub>2</sub> film after calcination at 350°C, b) Hierarchically textured mesostructured SiO<sub>2</sub> film after heating at 200°C, c) As prepared islands (heated up to 180°C).

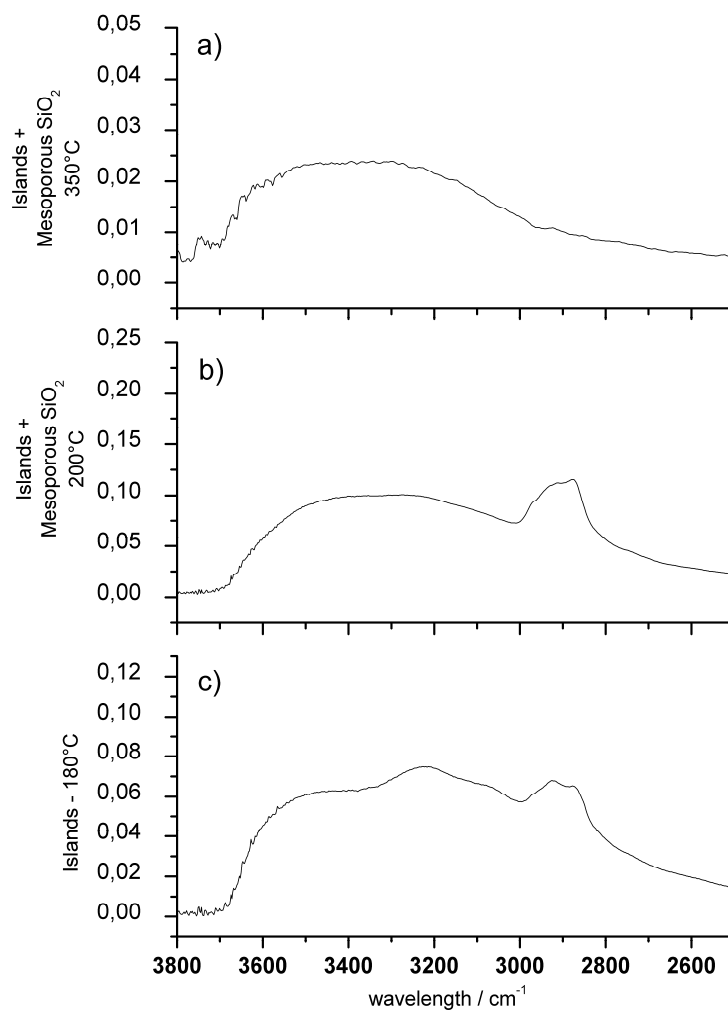

Supplement: b902378j.pdf [file b902378j.pdf]
